# Supplementary material for: Metagenomic sequencing for detection and identification of the boxwood blight pathogen Calonectria pseudonaviculata
Source: PubMed Central journal article supplement (PMC8791934; doi:10.1038/s41598-022-05381-x), 2022-01-26

# Metagenomic Sequencing for Detection and Identification of the Boxwood Blight Pathogen

## *Calonectria pseudonaviculata*

Shu Yang<sup>1</sup>, Marcela A. Johnson<sup>1,2</sup>, Mary Ann Hansen<sup>1</sup>, Elizabeth Bush<sup>1</sup>, Song Li<sup>1</sup>, Boris A.

Vinatzer<sup>1\*</sup>

1 School of Plant and Environmental Sciences, Virginia Tech, Blacksburg, VA, United States

2 Graduate Program in Genetics, Bioinformatics, and Computational Biology, Virginia Tech,  
Blacksburg, VA, United States

## Supplementary Materials

**Supplementary Figure 1.** Diseased boxwood naturally infected with *C. pseudonaviculata*.

**Supplementary Figure 2.** Krona plots based on the percentage reads classified using the custom database with 29 genomes by Kraken 2.

**Supplementary Table 1.** List of genomes used in the extensive custom database with BLASTN, Kraken 2, and/or sourmash.

**Supplementary Table 2.** Fungal hits obtained with BLASTN and Kraken 2.

**Supplementary Table 3.** The 31 reads of sample S1 that had been identified as *C. henricotiae* when using a custom library were compared against NCBI's entire database using BLASTN and the best hits for each read are shown below. None of the reads was identified as *C. henricotiae* showing that using a larger library would have eliminated the false positives for *C. henricotiae*.

**Supplementary Table 4.** Sequencing statistics of G10 with ONT MinION and Illumina HiSeq.

**Supplementary Results 1.** Boxwood infected with *Cps* harbored different prokaryotic communities compared to healthy boxwood.

## Supplementary Figures

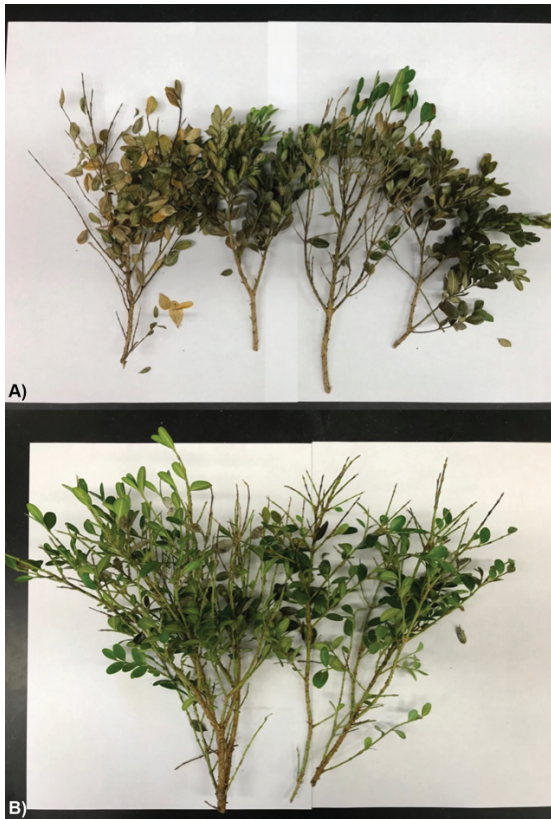

**Supplementary Figure 1.** Diseased boxwood naturally infected with *Cps*. A) Moderately diseased boxwood. B) Severely diseased boxwood.

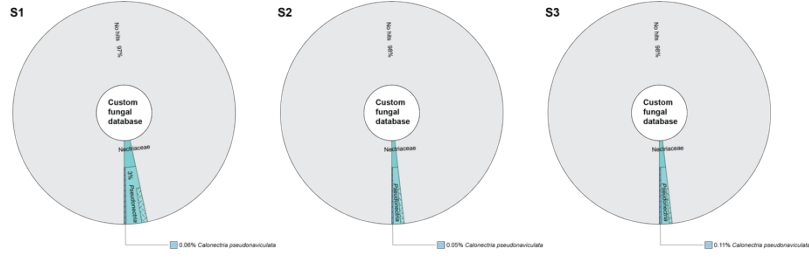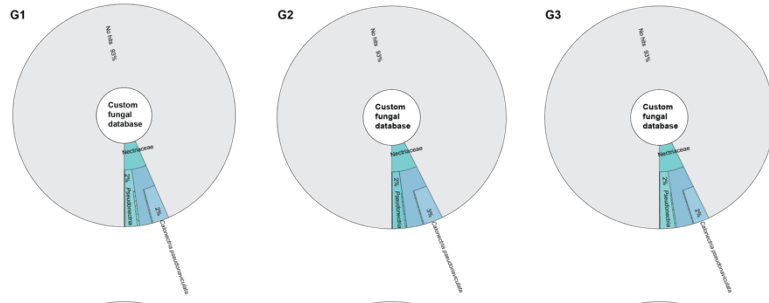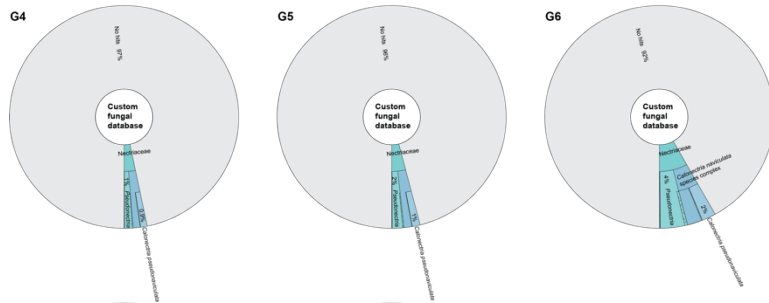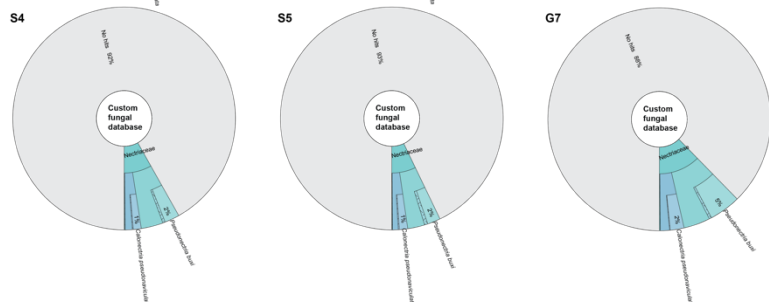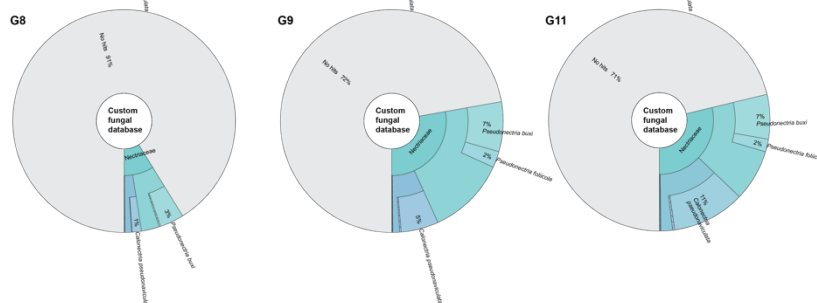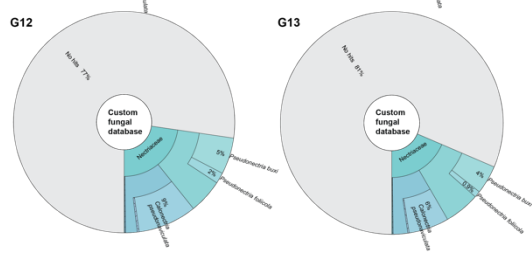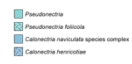

**Supplementary Figure 2.** Krona plots based on the percentage reads classified using the custom database with 29 genomes by Kraken 2. Each color represents a clade. Each plots represents a sample sequenced by the MinION sequencer.

**Supplementary Table S1.** List of genomes used in the extensive custom database with BLASTN, Kraken 2, and/or sourmash

| Genome                              | Strain                      | Accession number |                 |
|-------------------------------------|-----------------------------|------------------|-----------------|
|                                     | CB077                       | GCA_004380935.1  |                 |
| <i>Calonectria henricotiae</i>      | CBS138102                   | GCA_004380885.1  |                 |
|                                     | NL009                       | GCA_004380965.1  |                 |
|                                     | NL017                       | GCA_004382205.1  |                 |
|                                     | CB002                       | GCA_004141935.1  |                 |
|                                     | CB002                       | GCA_006505905.1  |                 |
|                                     | CBS139394                   | GCA_001696505.1  |                 |
| <i>Calonectria pseudonaviculata</i> | CBS139395                   | GCA_004380915.1  |                 |
|                                     | CBS14417                    | GCA_004381005.1  |                 |
|                                     | CT13                        | GCA_004380985.1  |                 |
|                                     | ICMP14368                   | GCA_004382245.1  |                 |
|                                     | NC-BB1                      | GCA_004381035.1  |                 |
|                                     | ODA1                        | GCA_004382225.1  |                 |
|                                     | 233423                      | GCA_000966635.1  |                 |
|                                     | 241165                      | GCA_000966645.1  |                 |
|                                     | CS3005                      | GCA_000599445.1  |                 |
|                                     | DAOM18037                   | GCA_001717915.1  |                 |
|                                     | FG078                       | GCA_006942295.1  |                 |
|                                     | <i>Fusarium graminearum</i> | FN009            | GCA_900476405.1 |
|                                     |                             | ITEM124          | GCA_002352725.1 |
|                                     |                             | MDC_Fg1          | GCA_900492705.1 |
| MDC_Fg13                            |                             | GCA_901446245.1  |                 |
| NRRL28336                           |                             | GCA_001717905.1  |                 |
| PH-1                                |                             | GCA_900044135.1  |                 |
| TaB10                               |                             | GCA_012959185.1  |                 |
| AR2711                              |                             | GCA_002911195.1  |                 |
| <i>Pseudonectria foliicola</i>      | JAC18-02                    | GCA_003693505.1  |                 |
|                                     | AR2414                      | GCA_003693545.1  |                 |
| <i>Pseudonectria buxi</i>           | JAC17-19                    | GCA_003693515.1  |                 |

**Supplementary Table S2.** Fungal hits obtained with BLASTN and Kraken 2

| Sample ID | # Total reads | BLASTN                                   |                                                     |                                       |                                          |                                     |                    | Kraken 2   |                                          |               |                                       |                                          |                                     |                                    |                    |            |  |
|-----------|---------------|------------------------------------------|-----------------------------------------------------|---------------------------------------|------------------------------------------|-------------------------------------|--------------------|------------|------------------------------------------|---------------|---------------------------------------|------------------------------------------|-------------------------------------|------------------------------------|--------------------|------------|--|
|           |               | # Hits of <i>Calonectria henricotiae</i> | # Hits of <i>Calonectria pseudonaviculata</i> (Cps) | # Hits of <i>Fusarium graminearum</i> | # Hits of <i>Pseudonectria foliicola</i> | # Hits of <i>Pseudonectria buxi</i> | % Identified reads | % Cps hits | # Hits of <i>Calonectria henricotiae</i> | # Hits of Cps | # Hits of <i>Fusarium graminearum</i> | # Hits of <i>Pseudonectria foliicola</i> | # Hits of <i>Pseudonectria buxi</i> | # Hits of non-specific Nectriaceae | % Identified reads | % Cps hits |  |
| S1        | 424,599       | 31                                       | 225                                                 | 54                                    | 8,897                                    | 1,203                               | 2.452%             | 0.053%     | 320                                      | 264           | 202                                   | 1843                                     | 1761                                | 10022                              | 3.394%             | 0.062%     |  |
| S2        | 469,952       | 10                                       | 188                                                 | 36                                    | 5,312                                    | 763                                 | 1.342%             | 0.040%     | 426                                      | 234           | 107                                   | 1284                                     | 1113                                | 5314                               | 1.804%             | 0.050%     |  |
| S3        | 351,180       | 9                                        | 410                                                 | 18                                    | 3,555                                    | 471                                 | 1.271%             | 0.117%     | 366                                      | 400           | 90                                    | 802                                      | 704                                 | 4170                               | 1.860%             | 0.114%     |  |
| G1        | 694,805       | 91                                       | 6,817                                               | 58                                    | 4,638                                    | 513                                 | 1.744%             | 0.981%     | 913                                      | 16,342        | 316                                   | 1,199                                    | 1,098                               | 25,572                             | 6.540%             | 2.352%     |  |
| G2        | 1,965,786     | 219                                      | 20,010                                              | 69                                    | 8,005                                    | 598                                 | 1.470%             | 1.018%     | 3,041                                    | 53,424        | 631                                   | 2,411                                    | 1,871                               | 81,733                             | 7.280%             | 2.718%     |  |
| G3        | 1,914,124     | 103                                      | 9,117                                               | 42                                    | 5,777                                    | 429                                 | 0.808%             | 0.476%     | 2,391                                    | 42,315        | 485                                   | 2,278                                    | 1,712                               | 86,925                             | 7.111%             | 2.211%     |  |
| G4        | 2,644,721     | 60                                       | 5,281                                               | 53                                    | 4,025                                    | 280                                 | 0.367%             | 0.200%     | 1,561                                    | 24,633        | 480                                   | 1,551                                    | 1,228                               | 56,420                             | 3.247%             | 0.931%     |  |
| G5        | 3,721,368     | 113                                      | 10,798                                              | 86                                    | 10,060                                   | 691                                 | 0.584%             | 0.290%     | 2,542                                    | 40,843        | 933                                   | 3,400                                    | 2,552                               | 98,586                             | 4.000%             | 1.098%     |  |
| G6        | 454,974       | 38                                       | 3,174                                               | 21                                    | 3,808                                    | 269                                 | 1.607%             | 0.698%     | 450                                      | 8,944         | 231                                   | 1,040                                    | 719                                 | 25,519                             | 8.111%             | 1.966%     |  |
| S4        | 2,358,938     | 73                                       | 4,377                                               | 313                                   | 28,795                                   | 16,572                              | 2.125%             | 0.186%     | 3,158                                    | 27,282        | 1,479                                 | 8,420                                    | 50,680                              | 101,482                            | 8.160%             | 1.157%     |  |
| S5        | 2,755,500     | 180                                      | 11,002                                              | 335                                   | 51,566                                   | 27,900                              | 3.302%             | 0.399%     | 4,256                                    | 33,325        | 1,650                                 | 13,050                                   | 51,947                              | 92,271                             | 7.131%             | 1.209%     |  |
| G7        | 1,343,224     | 166                                      | 13,087                                              | 72                                    | 17,263                                   | 13,392                              | 3.274%             | 0.974%     | 1,266                                    | 26,970        | 466                                   | 4,729                                    | 61,216                              | 70,771                             | 12.315%            | 2.008%     |  |
| G8        | 2,736,033     | 173                                      | 14,276                                              | 105                                   | 21,025                                   | 20,780                              | 2.060%             | 0.522%     | 1,903                                    | 36,942        | 889                                   | 5,994                                    | 95,452                              | 99,711                             | 8.804%             | 1.350%     |  |
| G9        | 295,648       | 229                                      | 15,178                                              | 45                                    | 34,849                                   | 15,430                              | 22.233%            | 5.134%     | 617                                      | 16,082        | 244                                   | 6,986                                    | 21,340                              | 36,876                             | 27.785%            | 5.440%     |  |
| G10       | 541,576       | 531                                      | 49,667                                              | 254                                   | 38,866                                   | 23,074                              | 20.753%            | 9.171%     | 1,644                                    | 52,677        | 824                                   | 10,321                                   | 34,658                              | 44,071                             | 26.625%            | 9.727%     |  |
| G11       | 289,025       | 297                                      | 29,440                                              | 104                                   | 23,887                                   | 13,364                              | 23.213%            | 10.186%    | 901                                      | 30,723        | 365                                   | 5,359                                    | 18,832                              | 26,969                             | 28.769%            | 10.630%    |  |
| G12       | 885,884       | 719                                      | 69,724                                              | 396                                   | 50,980                                   | 30,563                              | 17.201%            | 7.871%     | 2,438                                    | 76,053        | 1,153                                 | 14,107                                   | 47,211                              | 60,102                             | 22.696%            | 8.585%     |  |
| G13       | 277,471       | 146                                      | 12,417                                              | 61                                    | 9,330                                    | 5,516                               | 9.900%             | 4.475%     | 560                                      | 16,224        | 244                                   | 2,527                                    | 11,523                              | 20,397                             | 18.551%            | 5.847%     |  |
| NC        | 831,673       | 5                                        | 137                                                 | 60                                    | 207                                      | 21                                  | 0.052%             | 0.016%     | 103                                      | 18            | 438                                   | 44                                       | 132                                 | 672                                | 0.169%             | 0.002%     |  |

**Table S3.** The 31 reads of sample S1 that had been identified as *C. henricotiae* when using a custom library were compared against NCBI's entire database using BLASTN and the best hits for each read are shown below. None of the reads was identified as *C. henricotiae* showing that using a larger library would have eliminated the false positives for *C. henricotiae*.

| Sequence ID                          | Accession      | Species                                      | Percent identity (%) | Length (bp) | E-value   |
|--------------------------------------|----------------|----------------------------------------------|----------------------|-------------|-----------|
| 0d8e0467-c80a-431b-b29c-d72f4d94fa8f | CP017483.1     | <i>Stenotrophomonas</i> sp.                  | 85.247               | 3240        | 0         |
| 0ed46597-f80f-402a-87b7-7be3d6bbb8ed | KU668563.1     | <i>Clonostachys rosea</i>                    | 84.512               | 1414        | 0         |
| 124c36d8-165a-4c82-9030-36113710ebfe | KF757229.1     | <i>Acremonium chrysogenum</i>                | 83.256               | 2150        | 0         |
| 126aaebc-5f57-478d-8a1b-a30d020613ff | MT447058.1     | <i>Orbiocrella patchii</i>                   | 78.953               | 2789        | 0         |
| 1e2fc753-f7fd-4321-8855-6cd0c5ab4b40 | NC_043850.1    | <i>Paecilomyces penicillatus</i>             | 75.835               | 1407        | 7.98E-158 |
| 2d363f0a-7175-4b13-a85d-f907435e20f1 | CP023323.1     | <i>Cordyceps militaris</i>                   | 74.481               | 964         | 5.44E-90  |
| 3262e0b6-f8bc-4093-adf9-d4be35b3d690 | KT585676.1     | <i>Lecanicillium saksenae</i>                | 79.4                 | 2165        | 0         |
| 3aba7db5-201d-450d-b83c-7709695964dc | NC_043850.1    | <i>Paecilomyces penicillatus</i>             | 78.261               | 2139        | 0         |
| 3e1f7f4a-54e9-463c-9b84-0db5b7956e92 | MK213319.1     | <i>Clonostachys rosea</i>                    | 75.211               | 2013        | 0         |
| 42b156f6-9ef0-44a5-b9fb-8914fb642537 | NC_043850.1    | <i>Paecilomyces penicillatus</i>             | 77.275               | 2275        | 0         |
| 44777610-d88e-4828-8d1d-3ff9b36120e5 | KT731105.1     | <i>Nectria cinnabarina</i>                   | 78.602               | 2790        | 0         |
| 5316e12b-191e-4e9d-9668-706ec8be082e | XM_024893633.1 | <i>Trichoderma citrinoviride</i>             | 75.984               | 1778        | 0         |
| 6caeeee3-a331-45a9-b101-3c78b57141f9 | CP014168.1     | <i>Sphingomonas panacis</i>                  | 74.589               | 913         | 3.93E-79  |
| 6efc4b38-515b-4b96-9284-1bebe77298af | LR792747.1     | <i>Metarhizium brunneum</i>                  | 81.251               | 4955        | 0         |
| 7568d60a-e985-47c4-ace7-f22e61d6439f | NC_043850.1    | <i>Paecilomyces penicillatus</i>             | 81.072               | 2277        | 0         |
| 863f5f43-ccb0-4c40-ae4c-3cbc1c4915a9 | CP052902.1     | <i>Fusarium oxysporum</i> f. sp. <i>koae</i> | 72.368               | 1748        | 5.78E-107 |
| 8b79c6be-8f97-4eb6-85e7-e62975ba0aff | NC_043850.1    | <i>Paecilomyces penicillatus</i>             | 80.19                | 2110        | 0         |
| 950c6db0-18be-4135-9fae-67bc6c6ccabc | XM_025725124.1 | <i>Fusarium venenatum</i>                    | 88.06                | 67          | 7.89E-09  |
| 98190aab-298d-4fa4-abc5-18cbe8b6313b | LR792747.1     | <i>Metarhizium brunneum</i>                  | 81.07                | 5251        | 0         |
| a27132f4-0f48-4e33-a1ef-a06746182cae | KU668563.1     | <i>Clonostachys rosea</i>                    | 80.963               | 1329        | 0         |
| a6b89184-2497-48d3-a0ce-e007159b32ac | NC_043850.1    | <i>Paecilomyces penicillatus</i>             | 85.686               | 1537        | 0         |
| ca4e70c0-6a70-4949-82bc-3bcd08762d93 | NC_043850.1    | <i>Paecilomyces penicillatus</i>             | 80.244               | 2293        | 0         |
| d2ff4fb3-c2b7-43a2-ad13-53389d4a38ef | CP020875.1     | <i>Trichoderma reesei</i>                    | 77.891               | 1963        | 0         |
| d7436683-d95c-421b-8f63-620af96158d2 | CP049930.1     | <i>Ustilaginoidea virens</i>                 | 75.232               | 1292        | 9.89E-151 |
| db59b963-441a-4d8e-a100-988235f39aa8 | NC_043850.1    | <i>Paecilomyces penicillatus</i>             | 82.965               | 2260        | 0         |
| de19d969-1acc-4388-8da8-f4519d096555 | KP742838.1     | <i>Fusarium mangiferae</i>                   | 73.01                | 2249        | 8.37E-144 |
| e660b8a2-a17b-4f02-abf1-825159431c8f | KU668563.1     | <i>Clonostachys rosea</i>                    | 84.768               | 1162        | 0         |
| f43202f4-32dc-489a-938e-cb48c8f760f8 | MT123351.1     | <i>Calonectria ilicicola</i>                 | 79.068               | 3153        | 0         |

Note that two reads had no hits at all.

**Supplementary Table S4.** Sequencing statistics of G10 with ONT MinION and Illumina HiSeq

| Sample                 | G10           |               | Negative control |               |
|------------------------|---------------|---------------|------------------|---------------|
|                        | Illumina      | MinION        | Illumina         | MinION        |
| # Total reads          | 17,033,700    | 541,576       | 271,857,762      | 831,673       |
| Total read length (bp) | 1,498,691,820 | 1,955,966,076 | 40,778,664,300   | 1,945,418,169 |
| Max read length (bp)   | 100           | 65,962        | 150              | 28,837        |
| Min read length (bp)   | 2             | 2             | 150              | 4             |
| Avg read length (bp)   | 88            | 3,612         | 150              | 2,339         |



## Supplementary Results 1

Boxwood infected with *Cps* harbored different prokaryotic communities compared to healthy boxwood

### Methods

A database of all NCBI RefSeq genomes in April 2021 was built to profile boxwood-associated prokaryotic communities using Kraken 2 v2.1.1 <sup>1</sup>. Pavian v1.0 <sup>2</sup> was used to visualize the taxonomic classification of the prokaryotic sequences.

### Results

Since metagenomics provides a complete picture of all microbes present in a sample, we decided to also take a look at the bacterial communities associated with boxwood. Therefore, Kraken 2 analysis was performed against a database containing all assembled bacterial genomes in RefSeq. MinION reads were combined based on disease severity and DNA extraction method, forming five composite samples: moderately diseased boxwood extracted after sonication, moderately diseased boxwood extracted by grinding, severely diseased boxwood extracted after sonication, severely diseased boxwood extracted by grinding, and healthy boxwood extracted by grinding. Supplementary Figure 3 shows the taxonomic profile of each group.

Because our DNA samples only came from a small number of boxwood samples, this analysis is necessarily descriptive and preliminary. However, some interesting trends were observed. Proteobacteria was the phylum with the highest relative abundance for all five composite samples (Supplementary Figure 3). Only for healthy

boxwood, Firmicutes was the second most abundant phylum (Supplementary Figure 3E). Another interesting feature of the healthy boxwood sample was the relatively high abundance of *Pasteurella multocida* followed by *Vibrio anguillarum* as the second most abundant species.

The only common feature among all symptomatic samples and absent from the healthy plant sample was the presence of *Pseudomonas putida* and *Pseudomonas fulva*. Bacterial communities of the severely diseased samples also included a relatively high abundance of *Pseudomonas monteilii* and *Pseudomonas rizosphereae*. While *Stenotrophomonas maltophilia* and other *Stenotrophomonas* species were relatively abundant in moderately diseased boxwood, the genera *Pantoea* and *Erwinia* were of higher relative abundance in severely diseased boxwood. Some bacterial species, such as *Buchnera aphidicola*, may have been present due to insects or due to human handling, (*Massilia oculi*).

## Discussion

Although these results are preliminary because of the small number of samples that were examined, the prokaryotic community composition appears to differ between healthy and diseased boxwood. The role of the detected bacterial species in regard to its effect on disease severity will need to be determined. Also, if some boxwood-associated community members may possibly have disease-suppressive ability that could be leveraged for disease management, similar to bacteria previously isolated from recycling irrigation systems<sup>3</sup>, should be determined.

## References

- 1 Wood, D. E., Lu, J. & Langmead, B. Improved metagenomic analysis with Kraken 2. *Genome Biol* **20**, 257, doi:10.1186/s13059-019-1891-0 (2019).
- 2 Breitwieser, F. P. & Salzberg, S. L. Pavian: interactive analysis of metagenomics data for microbiome studies and pathogen identification. *Bioinformatics* **36**, 1303-1304, doi:10.1093/bioinformatics/btz715 (2020).
- 3 Yang, X. & Hong, C. Biological control of boxwood blight by *Pseudomonas protegens* recovered from recycling irrigation systems. *Biological Control* **124**, 68-73, doi:<https://doi.org/10.1016/j.biocontrol.2018.01.014> (2018).

**Supplementary Figure 3.** Sankey plots for taxonomic profiling of the metagenome based on reads mapped against RefSeq complete bacterial genomes. The heights of the rectangles indicate the number of reads assigned per taxa and rank, also indicated above/next to each taxa. A) Results of all moderately diseased samples (S1 – S3) that were sonicated. B) Results of all moderately diseased samples (G1 – G6) that were homogenized in liquid nitrogen. C) Results of all severely diseased samples (S4 – S5) that were sonicated. D) Results of all severely diseased samples (G7 – G13) that were homogenized in liquid nitrogen. E) Results of the negative control (NC).

**See next page for Figure.**

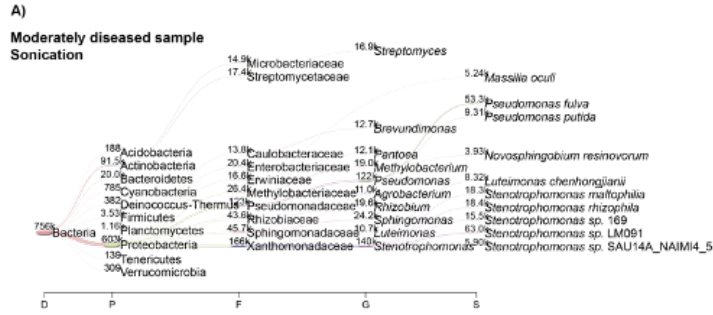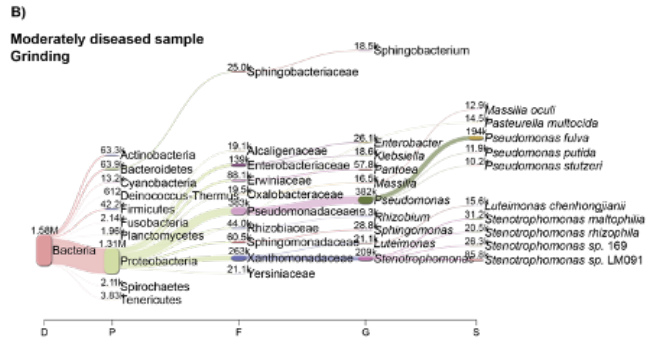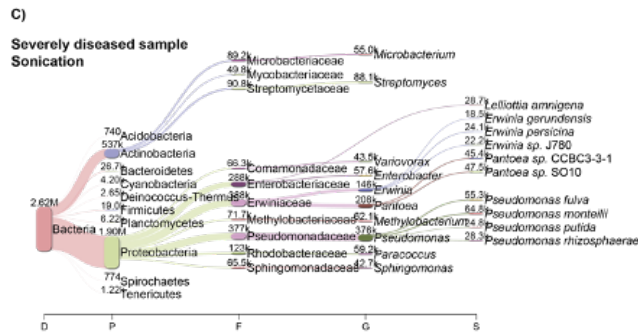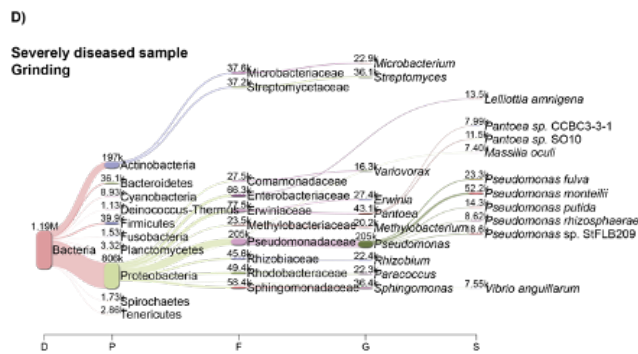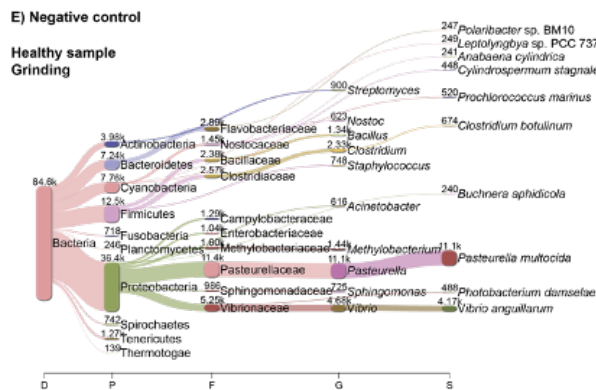

Supplement: 41598_2022_5381_MOESM1_ESM.pdf [file 41598_2022_5381_MOESM1_ESM.pdf]
